# Supplementary material
Source: PubMed Central journal article supplement (PMC7724284)
Supplement: mmc1.pdf [file mmc1.pdf]

Supplementary Appendix 1.

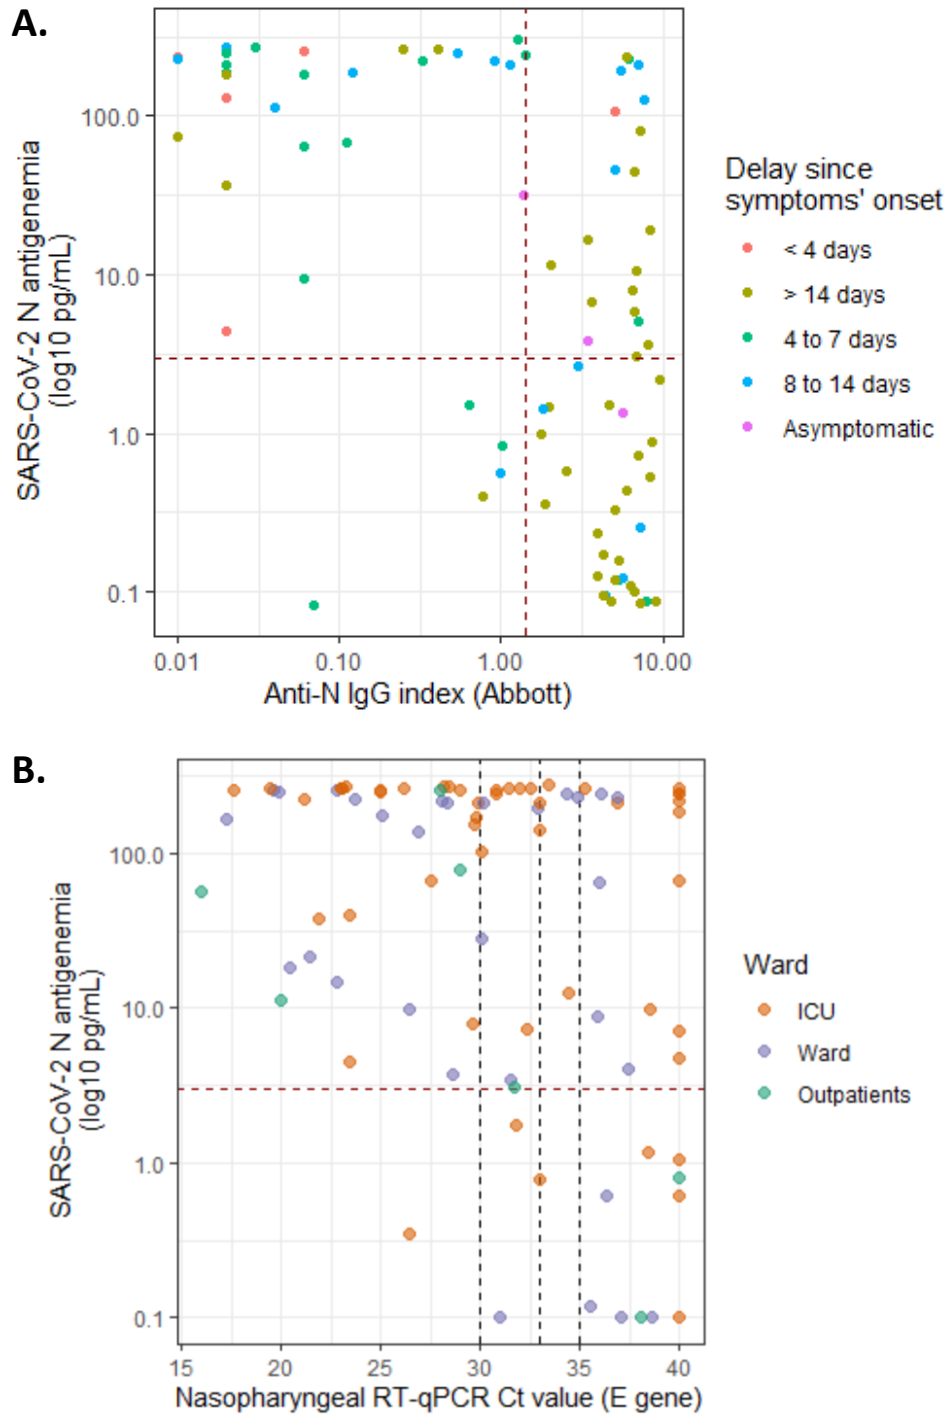

**Panel (A):** N-antigen sera levels according to anti-N IgG index (Abbot). The positivity threshold values for N-antigen (2.97 pg/mL) and anti-N IgG index (1.4) are indicated with dashed red lines.

**Panel (B):** N-antigen sera levels according to E-gene cycle threshold value of nasopharyngeal swabs collected within 24 hours. The positivity threshold value for N-antigen (2.97 pg/mL) is indicated with a dashed red line. The RT-PCR Ct values of 30, 33 and 35 are indicated with dashed black lines.

**Supplementary Figure 2.**

**Figure legend:** Flowchart of sera used in this study, according to symptoms onset and hospitalization status.

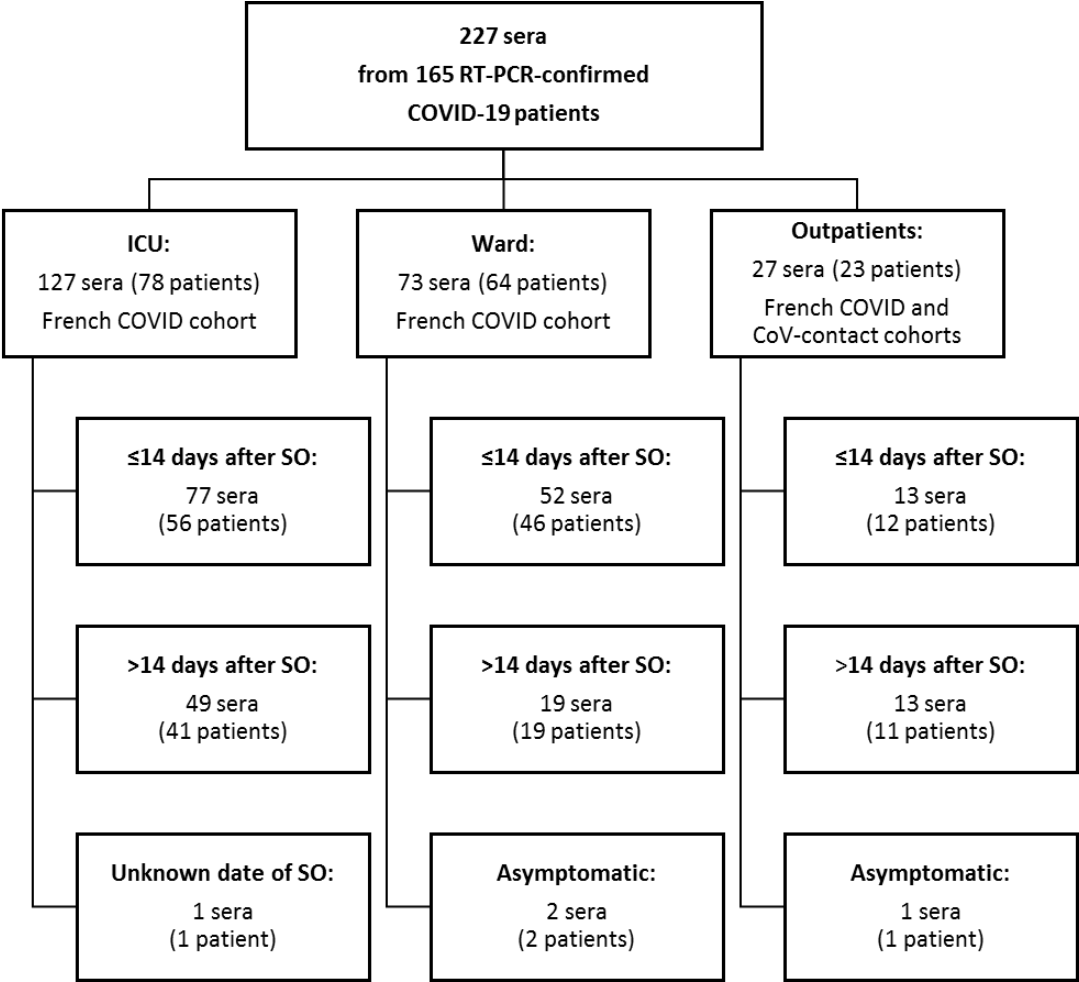

**Supplementary Table 1.**

**Table:** Contingency table for the COVID-19 Quantigene® assay.

|                           |          | COVID-19 positive |                               | COVID-19 negative |
|---------------------------|----------|-------------------|-------------------------------|-------------------|
|                           |          | Overall           | Within 14 first days after SO |                   |
| Serum N-antigen detection | Positive | 180               | 132                           | 1                 |
|                           | Negative | 47                | 10                            | 62                |
